# Supplementary material
Source: PubMed Central journal article supplement (PMC3791270)
Supplement: mmc1.pdf [file mmc1.pdf]

**American Journal of Human Genetics, Volume 93**

## **Supplemental Data**

### **Haplotype Estimation Using Sequencing Reads**

**Olivier Delaneau, Bryan Howie, Anthony J. Cox, Jean-Francois Zagury,  
and Jonathan Marchini**

#### **Supplemental Inventory**

#### **Supplemental Figures and Tables**

Figure S1

Table S1

## Supplemental Materials

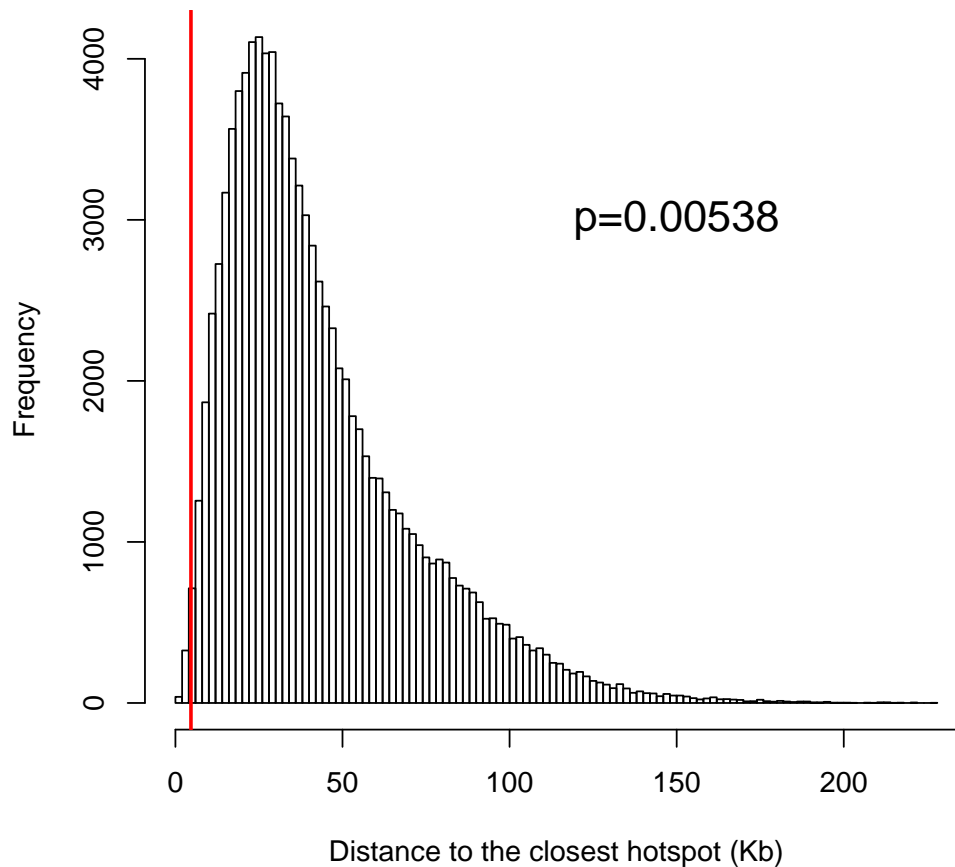

**Figure S1 :** Distribution of the distances between 100,000 sets of 4 randomly chosen physical positions on chromosome 20 and their closest respective hotspots. 100,000 sets of 4 physical positions were randomly drawn in the reachable position range of chromosome 20. For each set, we measured the distances between the 4 random positions to their closest flanking hotspots (recombination rate  $\geq 10$  cM/Mb) and average them. The 100,000 mean distances were then plotted, resulting in this distribution of distances. Mean distance for the 4 singletons incorrectly phased is shown with the red vertical line, leading to an empirical p-value of 0.00538.

| Software | TGP phased | TGP coverage | Trio coverage | Running time (h) |
|----------|------------|--------------|---------------|------------------|
| Beagle   | no         | 0x           | 0x            | 3.95             |
| SHAPEIT2 | no         | 0x           | 0x            | 20.6             |
| SHAPEIT2 | no         | 0x           | 5x            | 20.7             |
| SHAPEIT2 | no         | 0x           | 10x           | 20.6             |
| SHAPEIT2 | no         | 0x           | 20x           | 20.8             |
| SHAPEIT2 | no         | 4x           | 0x            | 38.9             |
| SHAPEIT2 | no         | 4x           | 5x            | 39               |
| SHAPEIT2 | no         | 4x           | 10x           | 38.3             |
| SHAPEIT2 | no         | 4x           | 20x           | 38.5             |
| SHAPEIT2 | yes        | 0x           | 0x            | 0.1              |
| SHAPEIT2 | yes        | 0x           | 5x            | 0.2              |
| SHAPEIT2 | yes        | 0x           | 10x           | 0.3              |
| SHAPEIT2 | yes        | 0x           | 20x           | 0.5              |

**Table S1 : Comparison of running times on the Illumina trio parents and TGP samples.** The second column (TGP phased) indicates if the haplotypes of 379 TGP European samples are considered as phased (yes) or have to be phased jointly with the Illumina trio parents (no). The third column (TGP coverage) tells if any reads were used to phase the TGP European samples. The fourth column (Trio coverage) shows the read coverage used to phase the Illumina trio parents. All the running times measured for SHAPEIT2 combine both the times needed to parse the BAM files and to run the MCMC algorithm. SHAPEIT2 was run using 1 thread.
